# Supplementary material for: Enhancing the antitumor activity of tea polyphenols encapsulated in biodegradable nanogels by macromolecular self-assembly
Source: Royal Society of Chemistry journal article supplement (doi:10.1039/c8ra07783e), 2019-01-01
Supplement: c8ra07783e1.pdf [file c8ra07783e1.pdf]

1 **Supporting Information**

2

3 **Enhancing antitumor activity of tea polyphenols**  
4 **encapsulated in biodegradable nanogels by**  
5 **macromolecular self-assembly**

6 Chen Liu<sup>a</sup>, Zhong Zhang<sup>a,b\*</sup>, Qingjun Kong<sup>a</sup>, Runguang Zhang<sup>a</sup> and Xingbin Yang<sup>a,\*</sup>

7 *<sup>a</sup>Shaanxi Engineering Laboratory for Food Green Processing and Safety Control,*  
8 *College of Food Engineering and Nutritional Science, Shaanxi Normal University, Xi'an*  
9 *710119, PR China.*

10 *<sup>b</sup>School of Chinese Medicine, Li Ka Shing Faculty of Medicine, The University of Hong Kong,*  
11 *10 Sassoon Road, Pokfulam, Hong Kong, PR China*

12

13 \* Corresponding author:

14 E-mail: z Zhang@snnu.edu.cn; Fax: +86 29-85310517; Tel: +86 29-85310517.

15 E-mail: xbyang@snnu.edu.cn; Fax: +86 29-85310580; Tel: +86 29-85310580.

## Contents

**Fig. S1.** (A) Mechanism process for free radical damages normal cell. (B) Mechanism of tea polyphenols inducing apoptosis in cancer cells.  $G_0$ : A phase where the cell has left the cycle and has stopped dividing.  $G_1$ : A phase that everything is ready for DNA synthesis.  $G_2$ : During the gap between DNA synthesis and mitosis, the cell will continue to grow. S: DNA replication occurs during this phase. M: Cell growth stops at this stage and cellular energy are focused on the orderly division into two daughter cells.

**Fig. S2.** SEM images of Ly-CMC COAs and NGs. (A) Ly-CMC COAs in the absence of chitosanase. (B) Ly-CMC COAs in the presence of chitosanase. (C) Ly-CMC NGs in the absence of chitosanase. (D) Ly-CMC NGs in the presence of chitosanase.

**Fig. S3.** SEM images of Ly-CMC NGs. (A) Ly-CMC NGs after heating. (B) TP-loaded NGs.

**Fig. S4.** (A) Gauss equation model of Ly-CMC NGs for TP in PBS buffer. (B) Zero-order equation model of Ly-CMC NGs for TP in PBS buffer.

**Fig. S5.** Representative HPLC chromatography of TP solution dispersed in 0.1 M phosphate buffer. (A) Free TP without heating. (B) Free TP after heating for 20 min. (C) TP-loaded NGs after heating for 20 min and cultivate for 24h. (D) TP-loaded NGs after heating for 20 min and cultivate for 48h. Detection wavelength is set at 274nm.

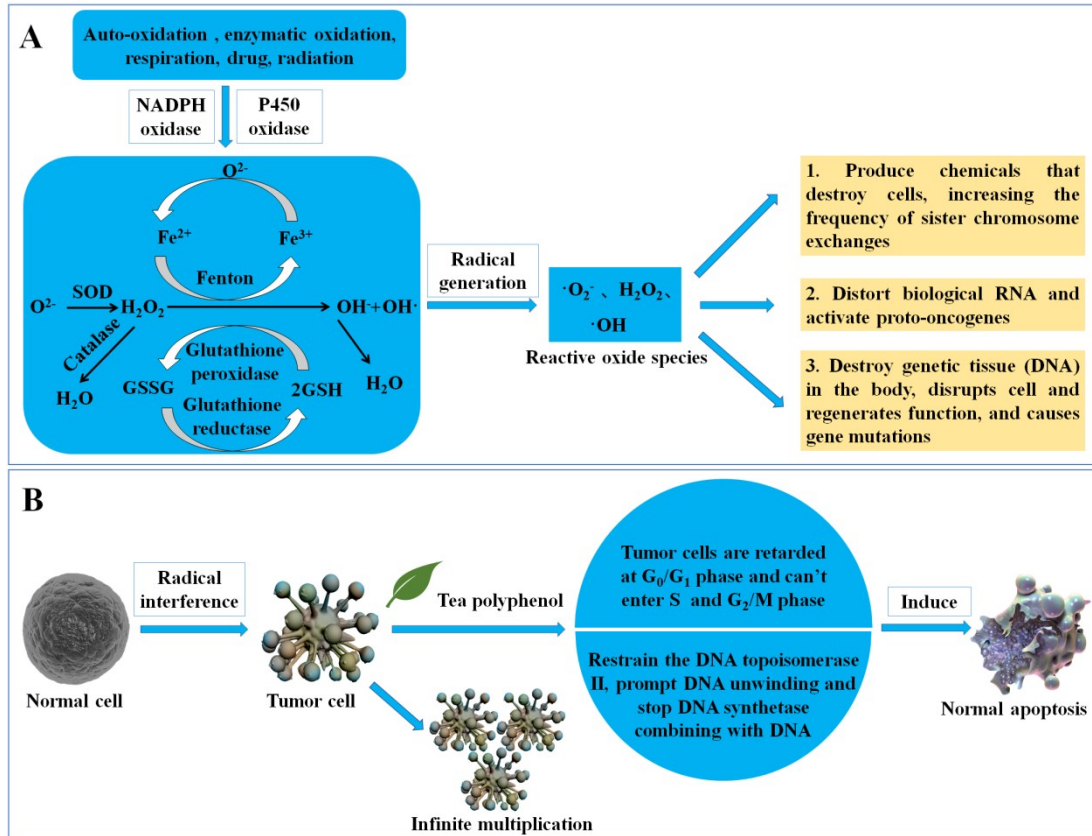

**Fig. S1.** (A) Mechanism process for free radical damages normal cell. (B) Mechanism of tea polyphenols inducing apoptosis in cancer cells.  $G_0$ : A phase where the cell has left the cycle and has stopped dividing.  $G_1$ : A phase that everything is ready for DNA synthesis.  $G_2$ : During the gap between DNA synthesis and mitosis, the cell will continue to grow. S: DNA replication occurs during this phase. M: Cell growth stops at this stage and cellular energy are focused on the orderly division into two daughter cells.

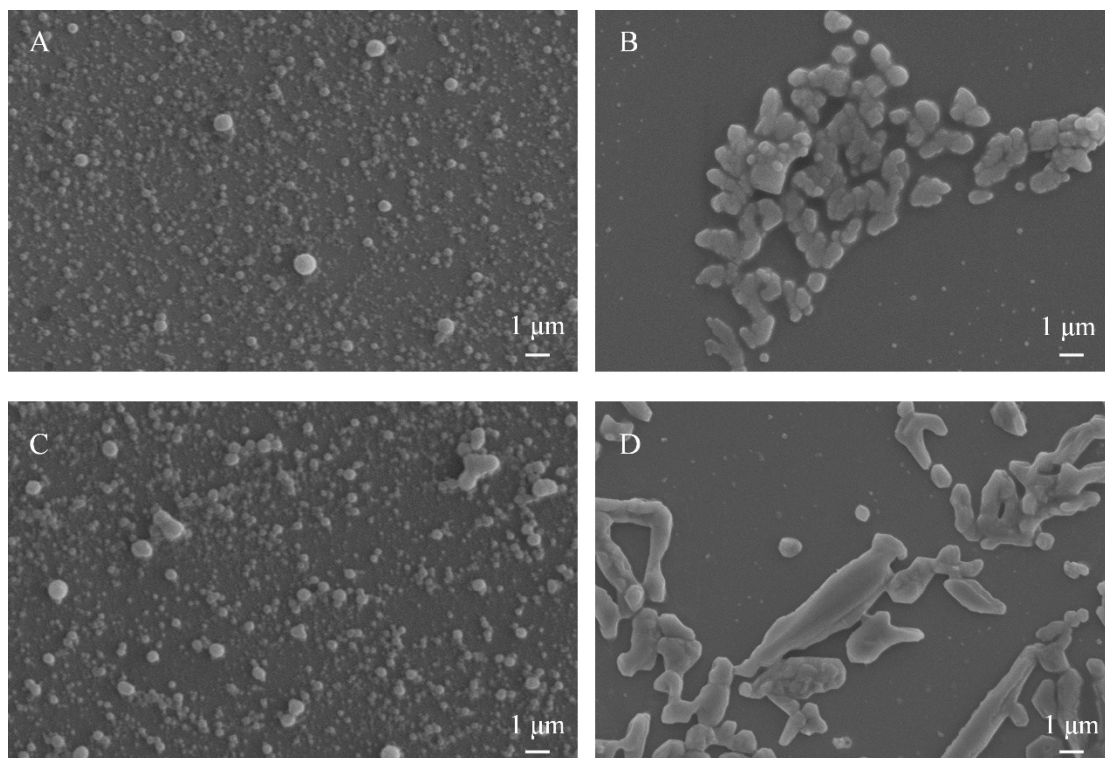

**Fig. S2.** SEM images of Ly-CMC COAs and NGs. (A) Ly-CMC COAs in the absence of chitosanase. (B) Ly-CMC COAs in the presence of chitosanase. (C) Ly-CMC NGs in the absence of chitosanase. (D) Ly-CMC NGs in the presence of chitosanase

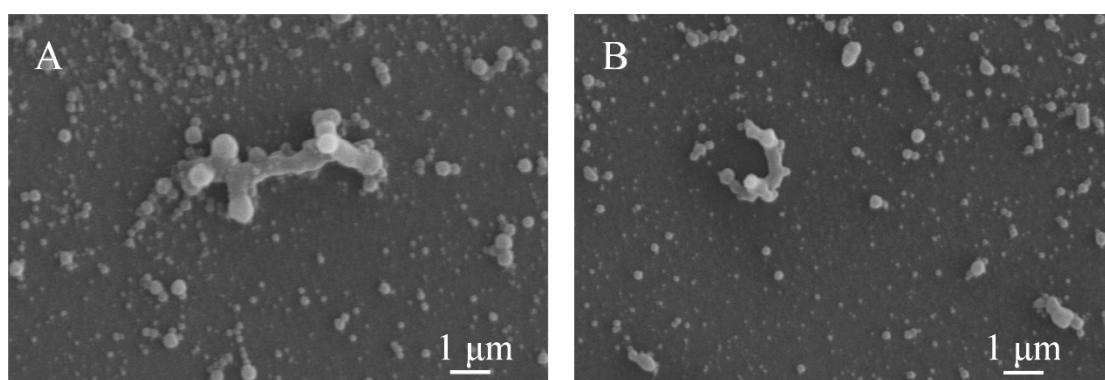

**Fig. S3.** SEM images of Ly-CMC NGs. (A) Ly-CMC NGs after heating. (B) TP-loaded Ly-CMC NGs.

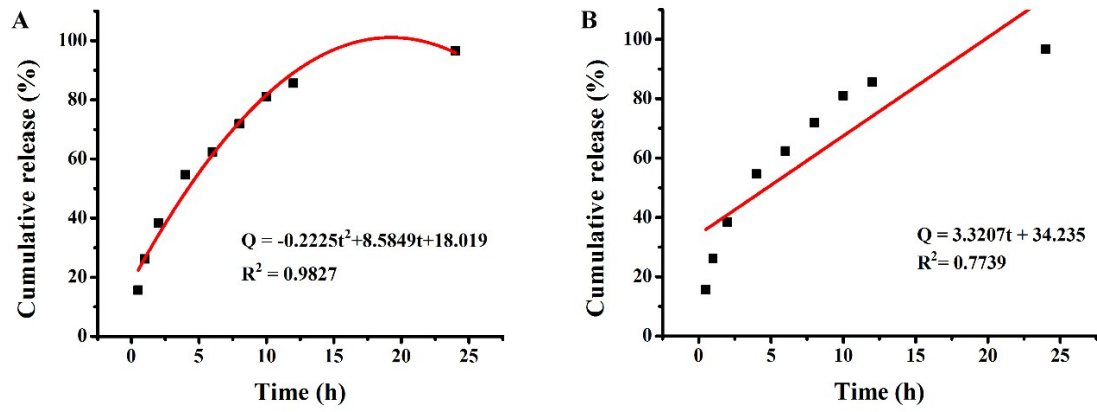

**Fig. S4.** (A) Gauss equation model of Ly-CMC NGs for TP in PBS buffer. (B) Zero-order equation model of Ly-CMC NGs for TP in PBS buffer.

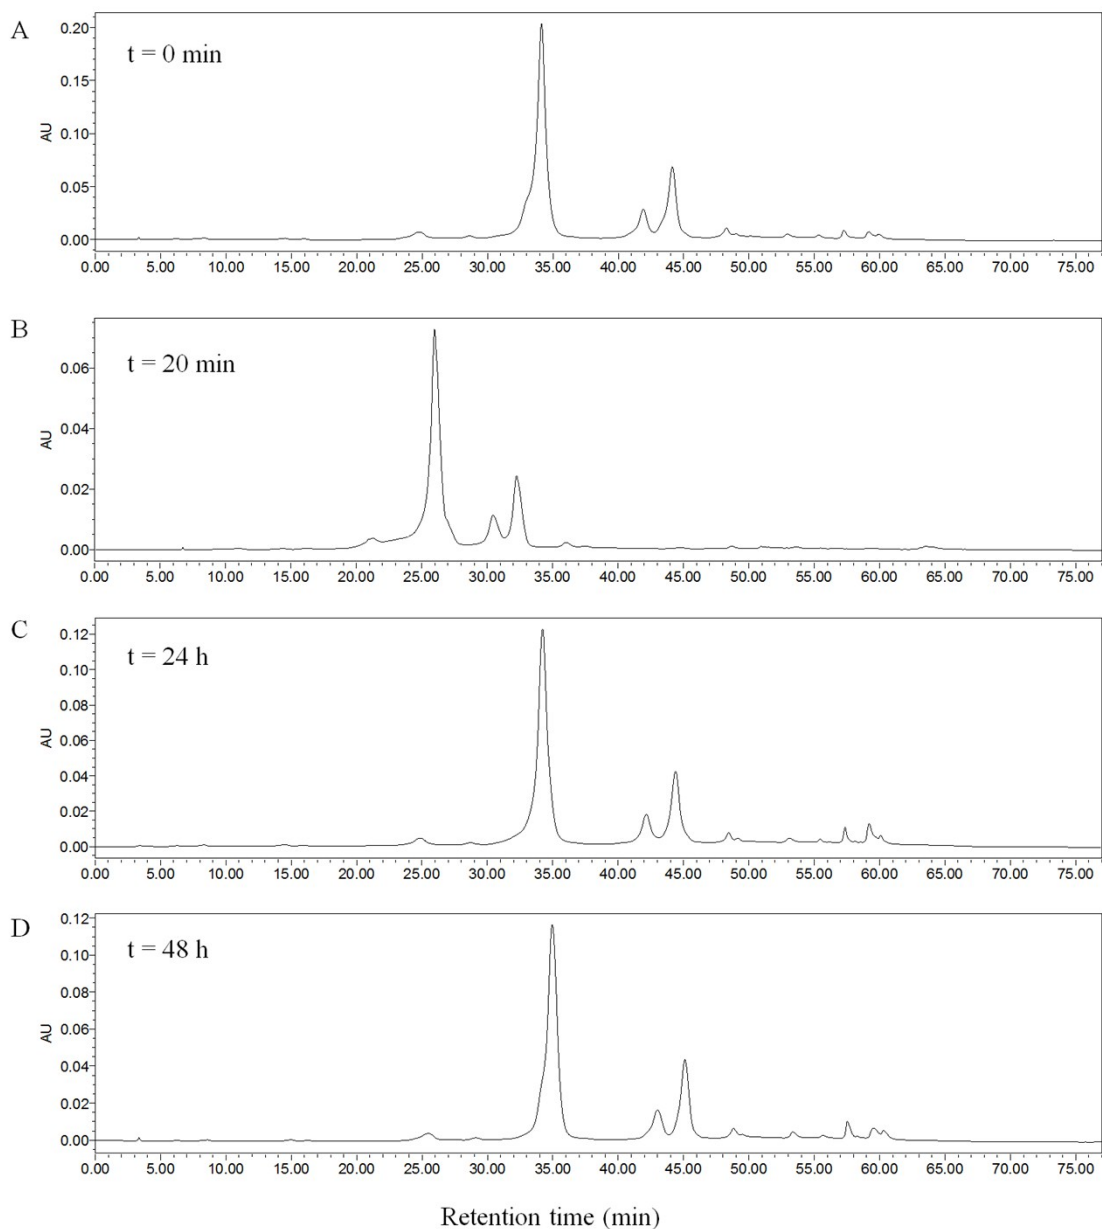

**Fig. S5.** Representative HPLC chromatography of TP solution dispersed in 0.1 M phosphate buffer. (A) Free TP without heating. (B) Free TP after heating for 20 min. (C) TP-loaded NGs after heating for 20 min and cultivate for 24 h. (D) TP-loaded NGs after heating for 20 min and cultivate for 48h. Detection wavelength is set at 274 nm.
